# Supplementary material for: Random Allelic Expression in Inherited Retinal Disease Genes
Source: MDPI journal article supplement (doi:10.3390/cimb45120625), 2023-12-13
Supplement: s1 [file s1]

**Table S1.** List of genes from RetNet that exhibit biallelic expression (BAE).

|           |          |
|-----------|----------|
| BAE Genes | ABCA4    |
|           | ACBD5    |
|           | ADAM9    |
|           | ADGRV1   |
|           | ADIPOR1  |
|           | AGBL5    |
|           | AHR      |
|           | ARHGEF18 |
|           | ARL3     |
|           | ARL6     |
|           | ARSG     |
|           | ATF6     |
|           | ATXN7    |
|           | BBIP1    |
|           | BBS1     |
|           | BBS10    |
|           | BBS12    |
|           | BBS4     |
|           | BBS5     |
|           | BBS7     |
|           | BBS9     |
|           | BEST1    |
|           | C12orf65 |
|           | C1QTNF5  |
|           | C8orf37  |
|           | CA4      |
|           | CABP4    |
|           | CACNA2D4 |
|           | CCT2     |
|           | CDH3     |
|           | CEP164   |
|           | CEP19    |
|           | CEP250   |

|         |
|---------|
| CEP290  |
| CEP78   |
| CERKL   |
| CLN3    |
| CLUAP1  |
| CNGA3   |
| CNGB1   |
| CRB1    |
| CSPP1   |
| CWC27   |
| DHDDS   |
| DHX38   |
| DRAM2   |
| DTHD1   |
| DYNC2H1 |
| ELOVL1  |
| ELOVL4  |
| EMC1    |
| EXOSC2  |
| EYS     |
| FAM161A |
| FZD4    |
| GDF6    |
| GNPTG   |
| GRM6    |
| GUCY2D  |
| HARS    |
| HGSNAT  |
| HK1     |
| HMCN1   |
| HMX1    |
| IDH3B   |
| IFT172  |
| IFT27   |

|          |
|----------|
| IFT81    |
| IMPG1    |
| IMPG2    |
| INVS     |
| ITM2B    |
| KCNV2    |
| KIAA1549 |
| KIF11    |
| KIF3B    |
| LCA5     |
| LRAT     |
| LRIT3    |
| LRP5     |
| LZTFL1   |
| MAK      |
| MFSD8    |
| MIEF1    |
| MKKS     |
| MKS1     |
| MVK      |
| NBAS     |
| NEK2     |
| NEUROD1  |
| NMNAT1   |
| NPHP1    |
| NR2F1    |
| NRL      |
| OPA1     |
| OPA3     |
| OPN1SW   |
| OTX2     |
| PANK2    |
| PAX2     |
| PCDH15   |

|          |
|----------|
| PDE6A    |
| PDE6C    |
| PDZD7    |
| PEX2     |
| PEX7     |
| PLK4     |
| POC1B    |
| POC5     |
| POMGNT1  |
| PRPF3    |
| PRPF31   |
| PRPF6    |
| RAB28    |
| RD3      |
| RDH11    |
| RDH12    |
| RGR      |
| RGS9BP   |
| RIMS1    |
| RLBP1    |
| ROM1     |
| RP1      |
| RP1L1    |
| RP9      |
| RPE65    |
| RPGRIP1  |
| RPGRIP1L |
| RTN4IP1  |
| SAMD11   |
| SDCCAG8  |
| SLC24A1  |
| SLC25A46 |
| SLC7A14  |
| SNRNP200 |

|  |          |
|--|----------|
|  | SPATA7   |
|  | TEAD1    |
|  | TMEM126A |
|  | TMEM216  |
|  | TMEM237  |
|  | TOPORS   |
|  | TRIM32   |
|  | TRNT1    |
|  | TTC8     |
|  | TTLL5    |
|  | TTPA     |
|  | TUBGCP4  |
|  | TUBGCP6  |
|  | TULP1    |
|  | UNC119   |
|  | USH1G    |
|  | WDR19    |
|  | ZNF423   |
