# Supplementary material for: Random Allelic Expression in Inherited Retinal Disease Genes
Source: MDPI journal article supplement (doi:10.3390/cimb45120625), 2023-12-13
Supplement: s1 [file s1]

**Table S2.** Additional biologic processes significantly enriched for biallelic expression (BAE) genes.

**Biallelic Expression, Significantly Enriched Biological Process**

fat-soluble vitamin metabolic process  
centrosome cycle  
smoothened signaling pathway  
plasma membrane bounded cell projection  
assembly  
fat cell differentiation  
cell projection assembly  
transport along microtubule  
heart looping  
response to light stimulus  
determination of left/right symmetry  
microtubule organizing center organization  
left/right pattern formation  
determination of bilateral symmetry  
specification of symmetry  
determination of heart left/right asymmetry  
embryonic heart tube morphogenesis  
retinoid metabolic process  
protein-containing complex localization  
diterpenoid metabolic process  
regulation of smoothened signaling pathway  
neural tube closure  
cytoskeleton-dependent intracellular transport  
tube closure  
microtubule-based transport  
spindle assembly  
terpenoid metabolic process  
primary neural tube formation  
isoprenoid metabolic process  
inner ear development  
neural tube formation  
ear development  
response to radiation  
tube formation  
epithelial tube formation  
organelle assembly  
neural tube development  
embryonic epithelial tube formation  
establishment of vesicle localization  
cell projection organization  
plasma membrane bounded cell projection  
organization  
embryonic organ morphogenesis

microtubule-based movement  
microtubule-based process  
regionalization  
detection of stimulus  
microtubule cytoskeleton organization  
pattern specification process  
embryonic organ development  
epithelial tube morphogenesis  
morphogenesis of an epithelium  
embryonic morphogenesis  
protein localization to organelle  
response to abiotic stimulus  
detection of stimulus involved in sensory perception  
tissue morphogenesis  
cellular component assembly  
cellular component biogenesis  
protein localization  
cellular macromolecule localization  
embryo development  
neuron projection development  
establishment of protein localization  
epithelium development  
cytoskeleton organization  
macromolecule localization  
head development  
brain development  
cellular localization  
organelle organization  
protein transport  
intracellular transport  
protein-containing complex assembly  
anatomical structure morphogenesis  
nitrogen compound transport  
cellular component organization  
cell development  
response to external stimulus  
cellular component organization or biogenesis  
localization  
organic substance transport  
cell differentiation  
cellular developmental process  
establishment of localization  
anatomical structure development  
developmental process

transport  
response to stimulus  
cellular process  
biological\_process  
immune response  
Unclassified
