# Supplementary material for: Random Allelic Expression in Inherited Retinal Disease Genes
Source: Curr Issues Mol Biol. 2023 Dec 13;45(12):10018–25. doi: 10.3390/cimb45120625 (PMC10742332; doi:10.3390/cimb45120625)
Supplement: Supplementary file 1 [file cimb-45-00625-s001.zip › Table S3. GO ontology output tables for RAE and BAE.xlsx]

## Sheet: Biologic GO BAE
Significant Results - Biological process
Analysis Type:	PANTHER Overrepresentation Test (Released 20221013)
Annotation Version and Release Date:	GO Ontology database DOI: 10.5281/zenodo.7942786 Released 2023-05-10
Analyzed List:	upload_1 (Homo sapiens)
Reference List:	Homo sapiens (all genes in database)
Test Type:	FISHER
Correction:	FDR
GO biological process complete	Homo sapiens - REFLIST (20589)	upload_1 (157)	upload_1 (expected)	upload_1 (over/under)	upload_1 (fold Enrichment)	upload_1 (raw P-value)	upload_1 (FDR)
pigment granule aggregation in cell center (GO:0051877)	2	2	0.02	+	> 100	0.000338	0.0316
regulation of centriole-centriole cohesion (GO:0030997)	3	2	0.02	+	87.43	0.000561	0.0492
photoreceptor cell morphogenesis (GO:0008594)	5	3	0.04	+	78.68	2.32e-05	0.003
protein localization to photoreceptor outer segment (GO:1903546)	7	4	0.05	+	74.94	1e-06	0.000152
retinal rod cell development (GO:0046548)	9	5	0.07	+	72.86	4.41e-08	8.9e-06
detection of light stimulus involved in sensory perception (GO:0050962)	22	11	0.17	+	65.57	5.48e-16	2.5e-13
detection of light stimulus involved in visual perception (GO:0050908)	22	11	0.17	+	65.57	5.48e-16	2.43e-13
photoreceptor cell maintenance (GO:0045494)	44	19	0.34	+	56.63	7.54e-26	1.3e-22
detection of visible light (GO:0009584)	38	16	0.29	+	55.22	8.72e-22	7.97e-19
photoreceptor cell outer segment organization (GO:0035845)	13	5	0.1	+	50.44	1.84e-07	3.29e-05
protein localization to non-motile cilium (GO:0097499)	13	5	0.1	+	50.44	1.84e-07	3.25e-05
centrosome separation (GO:0051299)	8	3	0.06	+	49.18	6.71e-05	0.00755
retinal rod cell differentiation (GO:0060221)	14	5	0.11	+	46.84	2.49e-07	4.15e-05
regulation of cilium beat frequency involved in ciliary motility (GO:0060296)	9	3	0.07	+	43.71	8.9e-05	0.00973
detection of light stimulus (GO:0009583)	63	21	0.48	+	43.71	1.58e-26	3.5e-23
photoreceptor cell development (GO:0042461)	49	16	0.37	+	42.82	2.5e-20	1.76e-17
phototransduction, visible light (GO:0007603)	13	4	0.1	+	40.35	6.96e-06	0.000956
camera-type eye photoreceptor cell differentiation (GO:0060219)	30	9	0.23	+	39.34	1.13e-11	3.3e-09
vitamin A metabolic process (GO:0006776)	10	3	0.08	+	39.34	0.000115	0.0122
leptin-mediated signaling pathway (GO:0033210)	10	3	0.08	+	39.34	0.000115	0.0122
protein localization to ciliary membrane (GO:1903441)	10	3	0.08	+	39.34	0.000115	0.0121
eye photoreceptor cell development (GO:0042462)	35	10	0.27	+	37.47	1.17e-12	3.79e-10
non-motile cilium assembly (GO:1905515)	58	16	0.44	+	36.18	2.45e-19	1.65e-16
retinal cone cell development (GO:0046549)	11	3	0.08	+	35.77	0.000146	0.0151
photoreceptor cell differentiation (GO:0046530)	63	17	0.48	+	35.39	2.43e-20	1.8e-17
retina homeostasis (GO:0001895)	83	22	0.63	+	34.76	6.81e-26	1.32e-22
sensory perception of light stimulus (GO:0050953)	223	56	1.7	+	32.93	2.75e-65	4.27e-61
retinal cone cell differentiation (GO:0042670)	12	3	0.09	+	32.79	0.000181	0.0181
visual perception (GO:0007601)	220	55	1.68	+	32.79	5.78e-64	4.49e-60
regulation of non-motile cilium assembly (GO:1902855)	12	3	0.09	+	32.79	0.000181	0.018
eye photoreceptor cell differentiation (GO:0001754)	50	12	0.38	+	31.47	3.59e-14	1.4e-11
phototransduction (GO:0007602)	42	10	0.32	+	31.22	5.56e-12	1.69e-09
intraciliary anterograde transport (GO:0035720)	17	4	0.13	+	30.86	1.71e-05	0.00227
intraciliary transport (GO:0042073)	47	11	0.36	+	30.69	5.49e-13	1.81e-10
detection of mechanical stimulus involved in sensory perception of sound (GO:0050910)	18	4	0.14	+	29.14	2.08e-05	0.00271
spliceosomal tri-snRNP complex assembly (GO:0000244)	14	3	0.11	+	28.1	0.000267	0.0258
protein localization to cilium (GO:0061512)	61	13	0.47	+	27.95	1.13e-14	4.89e-12
retina morphogenesis in camera-type eye (GO:0060042)	64	13	0.49	+	26.64	1.95e-14	7.98e-12
melanosome transport (GO:0032402)	20	4	0.15	+	26.23	2.98e-05	0.00376
pigment granule transport (GO:0051904)	21	4	0.16	+	24.98	3.53e-05	0.00438
establishment of melanosome localization (GO:0032401)	21	4	0.16	+	24.98	3.53e-05	0.00435
inner ear receptor cell stereocilium organization (GO:0060122)	38	7	0.29	+	24.16	4.43e-08	8.82e-06
establishment of pigment granule localization (GO:0051905)	22	4	0.17	+	23.84	4.14e-05	0.00495
chaperone-mediated protein complex assembly (GO:0051131)	22	4	0.17	+	23.84	4.14e-05	0.00491
detection of external stimulus (GO:0009581)	139	25	1.06	+	23.59	1.19e-25	1.85e-22
detection of abiotic stimulus (GO:0009582)	141	25	1.08	+	23.25	1.63e-25	2.3e-22
cellular response to leptin stimulus (GO:0044320)	17	3	0.13	+	23.14	0.000441	0.0403
mitochondrial fission (GO:0000266)	17	3	0.13	+	23.14	0.000441	0.04
regulation of cilium beat frequency (GO:0003356)	17	3	0.13	+	23.14	0.000441	0.0398
melanosome localization (GO:0032400)	23	4	0.18	+	22.81	4.84e-05	0.00565
pigment granule localization (GO:0051875)	24	4	0.18	+	21.86	5.61e-05	0.00645
retinal metabolic process (GO:0042574)	18	3	0.14	+	21.86	0.000512	0.0454
neural retina development (GO:0003407)	76	12	0.58	+	20.71	2.89e-12	9.15e-10
retina development in camera-type eye (GO:0060041)	159	23	1.21	+	18.97	9.86e-22	8.51e-19
inner ear receptor cell development (GO:0060119)	52	7	0.4	+	17.65	3.05e-07	4.98e-05
camera-type eye morphogenesis (GO:0048593)	130	15	0.99	+	15.13	3.17e-13	1.09e-10
eye morphogenesis (GO:0048592)	159	17	1.21	+	14.02	2.45e-14	9.74e-12
inner ear receptor cell differentiation (GO:0060113)	66	7	0.5	+	13.91	1.33e-06	0.000201
cilium assembly (GO:0060271)	332	35	2.53	+	13.83	1.52e-28	3.94e-25
brain morphogenesis (GO:0048854)	38	4	0.29	+	13.8	0.000282	0.0271
detection of mechanical stimulus involved in sensory perception (GO:0050974)	38	4	0.29	+	13.8	0.000282	0.0269
cilium organization (GO:0044782)	366	38	2.79	+	13.62	8.68e-31	3.37e-27
anatomical structure homeostasis (GO:0060249)	241	24	1.84	+	13.06	3.51e-19	2.27e-16
tissue homeostasis (GO:0001894)	241	24	1.84	+	13.06	3.51e-19	2.18e-16
mechanoreceptor differentiation (GO:0042490)	71	7	0.54	+	12.93	2.09e-06	0.00031
fat-soluble vitamin metabolic process (GO:0006775)	41	4	0.31	+	12.79	0.000369	0.0339
centrosome cycle (GO:0007098)	90	8	0.69	+	11.66	7.95e-07	0.000125
smoothened signaling pathway (GO:0007224)	91	8	0.69	+	11.53	8.6e-07	0.000134
plasma membrane bounded cell projection assembly (GO:0120031)	427	35	3.26	+	10.75	3.93e-25	5.08e-22
fat cell differentiation (GO:0045444)	125	10	0.95	+	10.49	8.09e-08	1.53e-05
cell projection assembly (GO:0030031)	439	35	3.35	+	10.46	9.3e-25	1.11e-21
transport along microtubule (GO:0010970)	165	13	1.26	+	10.33	1.02e-09	2.36e-07
heart looping (GO:0001947)	64	5	0.49	+	10.25	0.000177	0.0179
camera-type eye development (GO:0043010)	337	26	2.57	+	10.12	3.65e-18	1.95e-15
response to light stimulus (GO:0009416)	316	24	2.41	+	9.96	1.11e-16	5.38e-14
sensory organ morphogenesis (GO:0090596)	278	21	2.12	+	9.91	1.15e-14	4.83e-12
determination of left/right symmetry (GO:0007368)	133	10	1.01	+	9.86	1.39e-07	2.52e-05
microtubule organizing center organization (GO:0031023)	107	8	0.82	+	9.8	2.68e-06	0.000393
eye development (GO:0001654)	385	28	2.94	+	9.54	7.02e-19	4.19e-16
left/right pattern formation (GO:0060972)	138	10	1.05	+	9.5	1.92e-07	3.32e-05
visual system development (GO:0150063)	389	28	2.97	+	9.44	9.05e-19	5.21e-16
determination of bilateral symmetry (GO:0009855)	139	10	1.06	+	9.43	2.05e-07	3.5e-05
specification of symmetry (GO:0009799)	140	10	1.07	+	9.37	2.18e-07	3.68e-05
determination of heart left/right asymmetry (GO:0061371)	70	5	0.53	+	9.37	0.000262	0.0256
embryonic heart tube morphogenesis (GO:0003143)	70	5	0.53	+	9.37	0.000262	0.0255
sensory system development (GO:0048880)	395	28	3.01	+	9.3	1.32e-18	7.32e-16
retinoid metabolic process (GO:0001523)	85	6	0.65	+	9.26	6.7e-05	0.00759
protein-containing complex localization (GO:0031503)	157	11	1.2	+	9.19	6.38e-08	1.22e-05
diterpenoid metabolic process (GO:0016101)	88	6	0.67	+	8.94	8.03e-05	0.00891
regulation of smoothened signaling pathway (GO:0008589)	89	6	0.68	+	8.84	8.52e-05	0.00938
neural tube closure (GO:0001843)	93	6	0.71	+	8.46	0.000107	0.0116
cytoskeleton-dependent intracellular transport (GO:0030705)	203	13	1.55	+	8.4	1.07e-08	2.31e-06
tube closure (GO:0060606)	94	6	0.72	+	8.37	0.000113	0.0121
microtubule-based transport (GO:0099111)	207	13	1.58	+	8.24	1.33e-08	2.83e-06
spindle assembly (GO:0051225)	98	6	0.75	+	8.03	0.000141	0.0147
terpenoid metabolic process (GO:0006721)	99	6	0.75	+	7.95	0.000148	0.0152
primary neural tube formation (GO:0014020)	99	6	0.75	+	7.95	0.000148	0.0151
sensory perception (GO:0007600)	994	59	7.58	+	7.78	6.77e-36	3.5e-32
isoprenoid metabolic process (GO:0006720)	135	8	1.03	+	7.77	1.35e-05	0.0018
sensory organ development (GO:0007423)	593	35	4.52	+	7.74	9.81e-21	7.62e-18
inner ear development (GO:0048839)	204	12	1.56	+	7.71	9.68e-08	1.77e-05
neural tube formation (GO:0001841)	106	6	0.81	+	7.42	0.000211	0.0209
ear development (GO:0043583)	232	13	1.77	+	7.35	4.76e-08	9.37e-06
response to radiation (GO:0009314)	445	24	3.39	+	7.07	1.41e-13	5.2e-11
tube formation (GO:0035148)	150	8	1.14	+	6.99	2.77e-05	0.00353
epithelial tube formation (GO:0072175)	135	7	1.03	+	6.8	0.000105	0.0114
organelle assembly (GO:0070925)	829	42	6.32	+	6.64	1.63e-22	1.58e-19
neural tube development (GO:0021915)	163	8	1.24	+	6.44	4.87e-05	0.00565
embryonic epithelial tube formation (GO:0001838)	127	6	0.97	+	6.2	0.000531	0.0469
nervous system process (GO:0050877)	1462	62	11.15	+	5.56	5.85e-30	1.82e-26
establishment of vesicle localization (GO:0051650)	167	7	1.27	+	5.5	0.000367	0.0339
cell projection organization (GO:0030030)	1195	49	9.11	+	5.38	1.42e-22	1.47e-19
plasma membrane bounded cell projection organization (GO:0120036)	1148	47	8.75	+	5.37	1.41e-21	1.16e-18
multicellular organismal-level homeostasis (GO:0048871)	594	24	4.53	+	5.3	4.78e-11	1.3e-08
embryonic organ morphogenesis (GO:0048562)	301	12	2.3	+	5.23	4.88e-06	0.000689
microtubule-based movement (GO:0007018)	389	15	2.97	+	5.06	4.57e-07	7.39e-05
microtubule-based process (GO:0007017)	820	31	6.25	+	4.96	2.58e-13	9.31e-11
regionalization (GO:0003002)	410	15	3.13	+	4.8	8.64e-07	0.000133
detection of stimulus (GO:0051606)	686	25	5.23	+	4.78	1.48e-10	3.71e-08
microtubule cytoskeleton organization (GO:0000226)	556	20	4.24	+	4.72	1.49e-08	3.13e-06
pattern specification process (GO:0007389)	458	16	3.49	+	4.58	6.6e-07	0.000106
embryonic organ development (GO:0048568)	458	16	3.49	+	4.58	6.6e-07	0.000105
epithelial tube morphogenesis (GO:0060562)	316	11	2.41	+	4.57	4.09e-05	0.00492
neuron development (GO:0048666)	864	29	6.59	+	4.4	2.77e-11	7.68e-09
morphogenesis of an epithelium (GO:0002009)	458	15	3.49	+	4.29	3.23e-06	0.000469
embryonic morphogenesis (GO:0048598)	591	19	4.51	+	4.22	1.92e-07	3.34e-05
system process (GO:0003008)	2080	63	15.86	+	3.97	1.01e-22	1.12e-19
protein localization to organelle (GO:0033365)	731	22	5.57	+	3.95	5.86e-08	1.14e-05
neuron differentiation (GO:0030182)	1081	32	8.24	+	3.88	5.22e-11	1.4e-08
generation of neurons (GO:0048699)	1151	34	8.78	+	3.87	1.22e-11	3.51e-09
animal organ morphogenesis (GO:0009887)	991	29	7.56	+	3.84	6.31e-10	1.51e-07
response to abiotic stimulus (GO:0009628)	1118	30	8.53	+	3.52	2.21e-09	4.99e-07
detection of stimulus involved in sensory perception (GO:0050906)	565	15	4.31	+	3.48	3.59e-05	0.00439
tissue morphogenesis (GO:0048729)	570	15	4.35	+	3.45	3.96e-05	0.0048
neurogenesis (GO:0022008)	1321	34	10.07	+	3.38	4.39e-10	1.06e-07
cellular component assembly (GO:0022607)	2418	60	18.44	+	3.25	2.36e-17	1.18e-14
cellular component biogenesis (GO:0044085)	2666	61	20.33	+	3	5.03e-16	2.37e-13
homeostatic process (GO:0042592)	1415	32	10.79	+	2.97	3.27e-08	6.69e-06
protein localization (GO:0008104)	1936	43	14.76	+	2.91	1.2e-10	3.12e-08
cellular macromolecule localization (GO:0070727)	1942	43	14.81	+	2.9	1.33e-10	3.37e-08
embryo development (GO:0009790)	1054	23	8.04	+	2.86	6.54e-06	0.000915
neuron projection development (GO:0031175)	700	15	5.34	+	2.81	0.000357	0.0332
nervous system development (GO:0007399)	2233	47	17.03	+	2.76	7.4e-11	1.95e-08
establishment of protein localization (GO:0045184)	1287	27	9.81	+	2.75	1.91e-06	0.000286
epithelium development (GO:0060429)	1103	23	8.41	+	2.73	1.34e-05	0.00181
cytoskeleton organization (GO:0007010)	1252	26	9.55	+	2.72	3.66e-06	0.000521
macromolecule localization (GO:0033036)	2377	48	18.13	+	2.65	1.76e-10	4.34e-08
head development (GO:0060322)	847	17	6.46	+	2.63	0.000303	0.0287
brain development (GO:0007420)	798	16	6.09	+	2.63	0.000463	0.0416
cellular localization (GO:0051641)	2700	54	20.59	+	2.62	1.07e-11	3.19e-09
organelle organization (GO:0006996)	3060	61	23.33	+	2.61	2.59e-13	9.12e-11
protein transport (GO:0015031)	1190	23	9.07	+	2.53	4.31e-05	0.00507
intracellular transport (GO:0046907)	1371	25	10.45	+	2.39	6.64e-05	0.00759
protein-containing complex assembly (GO:0065003)	1267	23	9.66	+	2.38	0.00015	0.0152
animal organ development (GO:0048513)	2925	53	22.3	+	2.38	7.09e-10	1.67e-07
anatomical structure morphogenesis (GO:0009653)	2244	40	17.11	+	2.34	2.81e-07	4.65e-05
multicellular organism development (GO:0007275)	3966	67	30.24	+	2.22	2.14e-11	6.03e-09
system development (GO:0048731)	3553	59	27.09	+	2.18	1.87e-09	4.28e-07
nitrogen compound transport (GO:0071705)	1627	26	12.41	+	2.1	0.000312	0.0293
cellular component organization (GO:0016043)	5560	87	42.4	+	2.05	8.83e-14	3.35e-11
multicellular organismal process (GO:0032501)	6713	105	51.19	+	2.05	3.99e-18	2.07e-15
cell development (GO:0048468)	2185	34	16.66	+	2.04	6.97e-05	0.00778
response to external stimulus (GO:0009605)	2422	37	18.47	+	2	3.31e-05	0.00415
cellular component organization or biogenesis (GO:0071840)	5774	88	44.03	+	2	3.35e-13	1.13e-10
localization (GO:0051179)	4507	68	34.37	+	1.98	2.68e-09	5.96e-07
organic substance transport (GO:0071702)	2219	33	16.92	+	1.95	0.000238	0.0234
cell differentiation (GO:0030154)	3590	51	27.38	+	1.86	6.69e-06	0.000928
cellular developmental process (GO:0048869)	3614	51	27.56	+	1.85	7.13e-06	0.000971
establishment of localization (GO:0051234)	3943	55	30.07	+	1.83	3.34e-06	0.00048
anatomical structure development (GO:0048856)	5201	72	39.66	+	1.82	3.05e-08	6.31e-06
developmental process (GO:0032502)	5702	78	43.48	+	1.79	8.88e-09	1.94e-06
transport (GO:0006810)	3774	51	28.78	+	1.77	2.73e-05	0.00351
response to stimulus (GO:0050896)	8243	90	62.86	+	1.43	1.79e-05	0.00235
cellular process (GO:0009987)	14672	147	111.88	+	1.31	3.83e-12	1.19e-09
biological_process (GO:0008150)	17812	155	135.82	+	1.14	9.38e-08	1.75e-05
immune response (GO:0006955)	1649	2	12.57	-	0.16	0.000503	0.0449
Unclassified (UNCLASSIFIED)	2777	2	21.18	-	0.09	9.38e-08	1.73e-05

## Sheet: Molecular GO BAE
Significant Results - Biological process
Analysis Type:	PANTHER Overrepresentation Test (Released 20221013)
Annotation Version and Release Date:	GO Ontology database DOI: 10.5281/zenodo.7942786 Released 2023-05-10
Analyzed List:	upload_1 (Homo sapiens)
Reference List:	Homo sapiens (all genes in database)
Test Type:	FISHER
Correction:	FDR
GO molecular function complete	Homo sapiens - REFLIST (20589)	upload_1 (157)	upload_1 (expected)	upload_1 (over/under)	upload_1 (fold Enrichment)	upload_1 (raw P-value)	upload_1 (FDR)
photoreceptor activity (GO:0009881)	18	4	0.14	+	29.14	2.08e-05	0.0525
tubulin binding (GO:0015631)	386	13	2.94	+	4.42	1.13e-05	0.0571
purine ribonucleotide binding (GO:0032555)	1910	32	14.56	+	2.2	2.29e-05	0.0386
ribonucleotide binding (GO:0032553)	1927	32	14.69	+	2.18	2.62e-05	0.0332
purine nucleotide binding (GO:0017076)	2014	33	15.36	+	2.15	3.51e-05	0.0355

## Sheet: Biologic GO RAE
Significant Results - Biological process
Analysis Type:	PANTHER Overrepresentation Test (Released 20221013)
Annotation Version and Release Date:	GO Ontology database DOI: 10.5281/zenodo.7942786 Released 2023-05-10
Analyzed List:	upload_1 (Homo sapiens)
Reference List:	Homo sapiens (all genes in database)
Test Type:	FISHER
Correction:	FDR
GO biological process complete	Homo sapiens - REFLIST (20589)	upload_1 (32)	upload_1 (expected)	upload_1 (over/under)	upload_1 (fold Enrichment)	upload_1 (raw P-value)	upload_1 (FDR)
equilibrioception (GO:0050957)	7	2	0.01	+	> 100	8.34e-05	0.0301
parallel actin filament bundle assembly (GO:0030046)	7	2	0.01	+	> 100	8.34e-05	0.0294
photoreceptor cell outer segment organization (GO:0035845)	13	3	0.02	+	> 100	1.87e-06	0.00112
protein depalmitoylation (GO:0002084)	10	2	0.02	+	> 100	0.000152	0.0493
photoreceptor cell maintenance (GO:0045494)	44	6	0.07	+	87.74	1.29e-10	4e-07
inner ear auditory receptor cell differentiation (GO:0042491)	45	4	0.07	+	57.19	9.63e-07	0.000712
retina homeostasis (GO:0001895)	83	7	0.13	+	54.26	7.33e-11	3.79e-07
photoreceptor cell development (GO:0042461)	49	4	0.08	+	52.52	1.33e-06	0.000858
photoreceptor cell differentiation (GO:0046530)	63	5	0.1	+	51.06	6.31e-08	6.12e-05
inner ear receptor cell stereocilium organization (GO:0060122)	38	3	0.06	+	50.8	3.48e-05	0.0146
hair cell differentiation (GO:0035315)	54	4	0.08	+	47.66	1.91e-06	0.0011
inner ear receptor cell differentiation (GO:0060113)	66	4	0.1	+	38.99	4.07e-06	0.00198
inner ear receptor cell development (GO:0060119)	52	3	0.08	+	37.12	8.43e-05	0.0291
mechanoreceptor differentiation (GO:0042490)	71	4	0.11	+	36.25	5.37e-06	0.00253
retina morphogenesis in camera-type eye (GO:0060042)	64	3	0.1	+	30.16	0.000152	0.0502
sensory perception of light stimulus (GO:0050953)	223	10	0.35	+	28.85	1.45e-12	2.25e-08
retina development in camera-type eye (GO:0060041)	159	7	0.25	+	28.33	5.48e-09	7.1e-06
camera-type eye morphogenesis (GO:0048593)	130	5	0.2	+	24.75	1.95e-06	0.00108
eye morphogenesis (GO:0048592)	159	6	0.25	+	24.28	1.83e-07	0.000167
sensory perception of sound (GO:0007605)	159	6	0.25	+	24.28	1.83e-07	0.000158
visual perception (GO:0007601)	220	8	0.34	+	23.4	1.65e-09	2.85e-06
anatomical structure homeostasis (GO:0060249)	241	8	0.37	+	21.36	3.31e-09	5.14e-06
tissue homeostasis (GO:0001894)	241	8	0.37	+	21.36	3.31e-09	4.67e-06
sensory perception of mechanical stimulus (GO:0050954)	182	6	0.28	+	21.21	3.94e-07	0.000322
camera-type eye development (GO:0043010)	337	10	0.52	+	19.09	7.43e-11	2.88e-07
sensory organ morphogenesis (GO:0090596)	278	8	0.43	+	18.52	9.78e-09	1.17e-05
eye development (GO:0001654)	385	10	0.6	+	16.71	2.63e-10	6.81e-07
visual system development (GO:0150063)	389	10	0.6	+	16.54	2.9e-10	6.44e-07
sensory system development (GO:0048880)	395	10	0.61	+	16.29	3.35e-10	6.51e-07
positive regulation of endocytosis (GO:0045807)	160	4	0.25	+	16.09	0.000117	0.0394
sensory organ development (GO:0007423)	593	12	0.92	+	13.02	4.82e-11	3.74e-07
glycerophospholipid metabolic process (GO:0006650)	287	5	0.45	+	11.21	8.1e-05	0.0299
multicellular organismal-level homeostasis (GO:0048871)	594	10	0.92	+	10.83	1.56e-08	1.61e-05
sensory perception (GO:0007600)	994	12	1.54	+	7.77	1.55e-08	1.72e-05
neuron development (GO:0048666)	864	8	1.34	+	5.96	4.21e-05	0.0168
neuron differentiation (GO:0030182)	1081	10	1.68	+	5.95	3.66e-06	0.00189
animal organ morphogenesis (GO:0009887)	991	9	1.54	+	5.84	1.46e-05	0.0063
cellular lipid metabolic process (GO:0044255)	918	8	1.43	+	5.61	6.45e-05	0.025
generation of neurons (GO:0048699)	1151	10	1.79	+	5.59	6.36e-06	0.00282
neurogenesis (GO:0022008)	1321	11	2.05	+	5.36	2.86e-06	0.00153
nervous system process (GO:0050877)	1462	12	2.27	+	5.28	1e-06	0.000706
homeostatic process (GO:0042592)	1415	11	2.2	+	5	5.53e-06	0.00253
system process (GO:0003008)	2080	12	3.23	+	3.71	3.73e-05	0.0153
animal organ development (GO:0048513)	2925	16	4.55	+	3.52	1.73e-06	0.00108
nervous system development (GO:0007399)	2233	12	3.47	+	3.46	7.52e-05	0.0285
system development (GO:0048731)	3553	18	5.52	+	3.26	7.42e-07	0.000576
multicellular organism development (GO:0007275)	3966	18	6.16	+	2.92	3.89e-06	0.00195
multicellular organismal process (GO:0032501)	6713	24	10.43	+	2.3	1.12e-06	0.000758

## Sheet: Molecular GO RAE
No significant results from molecular process
Analysis Type:	PANTHER Overrepresentation Test (Released 20221013)
Annotation Version and Release Date:	GO Ontology database DOI: 10.5281/zenodo.7942786 Released 2023-05-10
Analyzed List:	upload_1 (Homo sapiens)
Reference List:	Homo sapiens (all genes in database)
Test Type:	FISHER
Correction:	FDR
GO molecular function complete	Homo sapiens - REFLIST (20589)	upload_1 (32)	upload_1 (expected)	upload_1 (over/under)	upload_1 (fold Enrichment)	upload_1 (raw P-value)	upload_1 (FDR)

## Sheet: GO Compare
Common Biologic GO Pathways	Unique to BAE	Unique to RAE
photoreceptor cell maintenance	pigment granule aggregation in cell center	equilibrioception
photoreceptor cell outer segment organization	regulation of centriole-centriole cohesion	parallel actin filament bundle assembly
photoreceptor cell development	photoreceptor cell morphogenesis	protein depalmitoylation
photoreceptor cell differentiation	protein localization to photoreceptor outer segment	inner ear auditory receptor cell differentiation
retina homeostasis	retinal rod cell development	hair cell differentiation
sensory perception of light stimulus	detection of light stimulus involved in sensory perception	sensory perception of sound
visual perception	detection of light stimulus involved in visual perception	sensory perception of mechanical stimulus
retina morphogenesis in camera-type eye	detection of visible light	positive regulation of endocytosis
inner ear receptor cell stereocilium organization	protein localization to non-motile cilium	glycerophospholipid metabolic process
retina development in camera-type eye	centrosome separation	cellular lipid metabolic process
inner ear receptor cell development	retinal rod cell differentiation
camera-type eye morphogenesis	regulation of cilium beat frequency involved in ciliary motility
eye morphogenesis	detection of light stimulus
inner ear receptor cell differentiation	phototransduction, visible light
anatomical structure homeostasis	camera-type eye photoreceptor cell differentiation
tissue homeostasis	vitamin A metabolic process
mechanoreceptor differentiation	leptin-mediated signaling pathway
camera-type eye development	protein localization to ciliary membrane
sensory organ morphogenesis	eye photoreceptor cell development
eye development	non-motile cilium assembly
visual system development	retinal cone cell development
sensory system development	retinal cone cell differentiation
sensory perception	regulation of non-motile cilium assembly
sensory organ development	eye photoreceptor cell differentiation
nervous system process	phototransduction
multicellular organismal-level homeostasis	intraciliary anterograde transport
neuron development	intraciliary transport
system process	detection of mechanical stimulus involved in sensory perception of sound
neuron differentiation	spliceosomal tri-snRNP complex assembly
generation of neurons	protein localization to cilium
animal organ morphogenesis	melanosome transport
neurogenesis	pigment granule transport
homeostatic process	establishment of melanosome localization
nervous system development	establishment of pigment granule localization
animal organ development	chaperone-mediated protein complex assembly
multicellular organism development	detection of external stimulus
system development	detection of abiotic stimulus
multicellular organismal process	cellular response to leptin stimulus
	mitochondrial fission
	regulation of cilium beat frequency
	melanosome localization
	pigment granule localization
	retinal metabolic process
	neural retina development
	cilium assembly
	brain morphogenesis
	detection of mechanical stimulus involved in sensory perception
	cilium organization
	fat-soluble vitamin metabolic process
	centrosome cycle
	smoothened signaling pathway
	plasma membrane bounded cell projection assembly
	fat cell differentiation
	cell projection assembly
	transport along microtubule
	heart looping
	response to light stimulus
	determination of left/right symmetry
	microtubule organizing center organization
	left/right pattern formation
	determination of bilateral symmetry
	specification of symmetry
	determination of heart left/right asymmetry
	embryonic heart tube morphogenesis
	retinoid metabolic process
	protein-containing complex localization
	diterpenoid metabolic process
	regulation of smoothened signaling pathway
	neural tube closure
	cytoskeleton-dependent intracellular transport
	tube closure
	microtubule-based transport
	spindle assembly
	terpenoid metabolic process
	primary neural tube formation
	isoprenoid metabolic process
	inner ear development
	neural tube formation
	ear development
	response to radiation
	tube formation
	epithelial tube formation
	organelle assembly
	neural tube development
	embryonic epithelial tube formation
	establishment of vesicle localization
	cell projection organization
	plasma membrane bounded cell projection organization
	embryonic organ morphogenesis
	microtubule-based movement
	microtubule-based process
	regionalization
	detection of stimulus
	microtubule cytoskeleton organization
	pattern specification process
	embryonic organ development
	epithelial tube morphogenesis
	morphogenesis of an epithelium
	embryonic morphogenesis
	protein localization to organelle
	response to abiotic stimulus
	detection of stimulus involved in sensory perception
	tissue morphogenesis
	cellular component assembly
	cellular component biogenesis
	protein localization
	cellular macromolecule localization
	embryo development
	neuron projection development
	establishment of protein localization
	epithelium development
	cytoskeleton organization
	macromolecule localization
	head development
	brain development
	cellular localization
	organelle organization
	protein transport
	intracellular transport
	protein-containing complex assembly
	anatomical structure morphogenesis
	nitrogen compound transport
	cellular component organization
	cell development
	response to external stimulus
	cellular component organization or biogenesis
	localization
	organic substance transport
	cell differentiation
	cellular developmental process
	establishment of localization
	anatomical structure development
	developmental process
	transport
	response to stimulus
	cellular process
	biological_process
	immune response
	Unclassified
